# Supplementary material for: The Formation of RNA Pre-Polymers in the Presence of Different Prebiotic Mineral Surfaces Studied by Molecular Dynamics Simulations
Source: MDPI journal article supplement (doi:10.3390/life13010112), 2022-12-30
Supplement: s1 [file s1]

**SUPPLEMENTARY MATERIAL TO:  
THE FORMATION OF RNA PRE-POLYMERS IN THE PRESENCE  
OF DIFFERENT PREBIOTIC MINERAL SURFACES STUDIED BY  
MOLECULAR DYNAMICS SIMULATIONS**

| Percentage of hydration (%) | Total number of water molecules | Approximate number of water molecules<br>per nucleotide |
|-----------------------------|---------------------------------|---------------------------------------------------------|
| 100                         | 12263-12878                     | 61-64                                                   |
| 85.4-89.7                   | 10170-11000                     | 51-55                                                   |
| 75.3-78.9                   | 8949-9680                       | 45-48                                                   |
| 61.3-69.7                   | 7175-8470                       | 36-42                                                   |
| 53.5-59.2                   | 6258-7260                       | 31-36                                                   |
| 40.8-51.6                   | 5217-6050                       | 26-30                                                   |
| 31.4-41.3                   | 4019-4840                       | 20-24                                                   |
| 24.2-31.1                   | 3094-3630                       | 15-18                                                   |
| 18.8-20.7                   | 2399-2420                       | 12                                                      |
| 9.0-10.3                    | 1210                            | 6                                                       |
| 4.6-5.2                     | 605                             | 3                                                       |

Supplementary Material, Table S1. Percentage of hydration and number of water molecules for all simulations containing a substrate.

| Percentage of hydration (%) | Total number of water molecules | Approximate number of water molecules<br>per nucleotide |
|-----------------------------|---------------------------------|---------------------------------------------------------|
| 100                         | 15436                           | 77                                                      |
| 71.3                        | 11014                           | 55                                                      |
| 61.9                        | 9549                            | 48                                                      |
| 54.8                        | 8462                            | 42                                                      |
| 47.6                        | 7344                            | 37                                                      |
| 34.6                        | 5340                            | 27                                                      |
| 28.8                        | 4452                            | 22                                                      |
| 23.2                        | 3579                            | 18                                                      |
| 16.2                        | 2500                            | 12                                                      |
| 6.5                         | 1000                            | 5                                                       |
| 3.2                         | 500                             | 3                                                       |

Supplementary Material, Table S2. Percentage of hydration and water molecules for the nucleotides-only system.
